# Supplementary material for: Spatiotemporal evolution and forecasting of public attention to special education: a GIS and SARIMA-LSTM based analysis
Source: PeerJ journal article supplement (doi:10.7717/peerj-cs.3293), 2025-10-17
Supplement: Public_attention2020to2024.xlsx [file Public_attention2020to2024.xlsx]

## Sheet: Sheet1
Year	Month	Public Attention
2020	1	740
2020	2	898
2020	3	1016
2020	4	1057
2020	5	1207
2020	6	1163
2020	7	2436
2020	8	1748
2020	9	1380
2020	10	959
2020	11	991
2020	12	1040
2021	1	841
2021	2	880
2021	3	1407
2021	4	1289
2021	5	1094
2021	6	2248
2021	7	1672
2021	8	1351
2021	9	1231
2021	10	1099
2021	11	1130
2021	12	1061
2022	1	845
2022	2	1186
2022	3	1324
2022	4	1225
2022	5	1199
2022	6	2756
2022	7	1729
2022	8	1151
2022	9	1063
2022	10	1008
2022	11	1021
2022	12	842
2023	1	794
2023	2	1278
2023	3	1418
2023	4	1247
2023	5	1155
2023	6	2656
2023	7	1684
2023	8	1294
2023	9	1402
2023	10	1267
2023	11	1304
2023	12	1477
2024	1	1229
2024	2	1372
2024	3	1553
2024	4	1410
2024	5	1522
2024	6	2263
2024	7	1781
2024	8	1423
2024	9	1437
2024	10	1225
2024	11	1495
2024	12	1431
